# Supplementary material for: Programmable repression and activation of bacterial gene expression using an engineered CRISPR-Cas system
Source: PubMed Central journal article supplement — Nucleic Acids Res. 2013 Jun 12;41(15):7429–37. doi: 10.1093/nar/gkt520 (PMC3753641; doi:10.1093/nar/gkt520), 2013-06-12
Supplement: supp_gkt520_nar-00609-h-2013-File006.pdf [file supp_gkt520_nar-00609-h-2013-File006.pdf]

**Programmable repression and activation of bacterial gene  
expression using an RNA-guided DNA binding protein**

**Supplementary Materials**

## Supplementary figures.

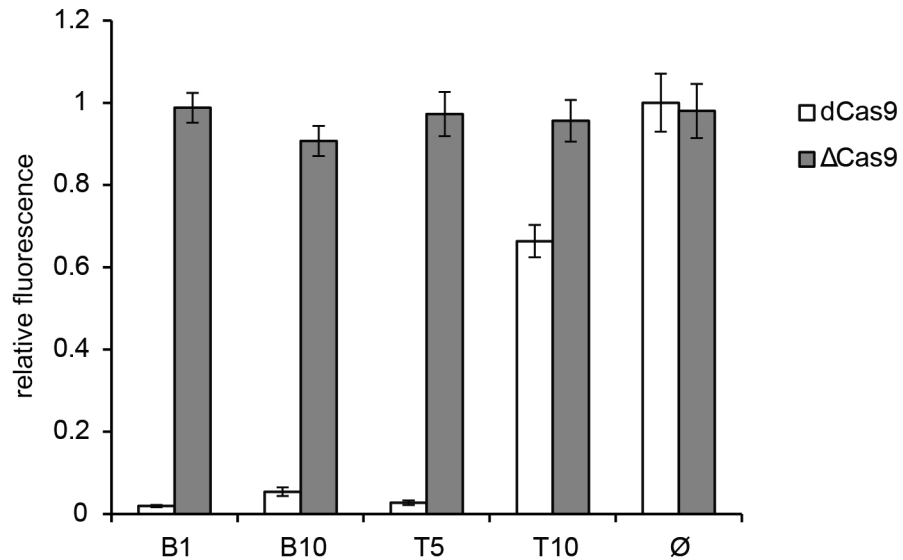

**Figure S1.** Repression in the absence of dCas9. To determine whether the expression of antisense crRNAs can exert *gfp-mut2* repression in the absence of dCas9 we measured the fluorescence of strains containing a plasmid expressing the crRNA but lacking the *dcas9* gene. Fluorescence of the different strains is reported relative to the fluorescence of a control strain lacking a targeting crRNA (Ø). The average of three independent experiments is indicated; error bars indicate one standard deviation.

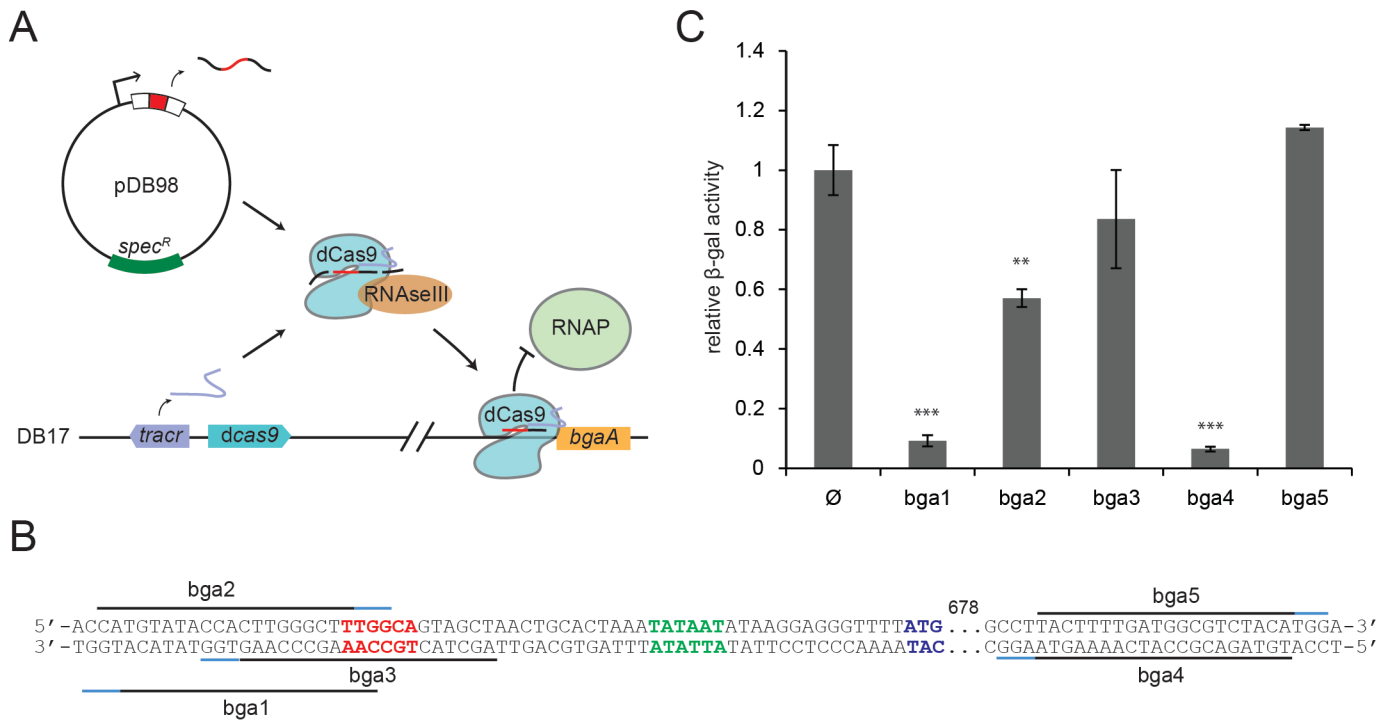

**Figure S2.** CrRNA-guided dCas9 repression in *S. pneumoniae*. **(A)** Strain DB17 contains chromosomal copies of the *dcas9* and *tracrRNA* genes. To direct dCas9 to the  $\beta$ -galactosidase gene (*bgaA*) promoter, a plasmid providing the different crRNA guides (pDB98) was introduced in this strain. **(B)** dCas9 targets in the *bgaA* promoter (bga1-5); underlined in light blue are the different NGG PAMs. Putative -35, -10 as well as the *bgaA* start codon are in red, green and blue letterhead, respectively. **(C)**  $\beta$ -galactosidase activity measured in Miller units for cells expressing the different crRNA guides and normalized against the value for cells expressing a non-targeting crRNA ( $\emptyset$ ). The average of three independent experiments is indicated; error bars indicate one standard deviation. Asterisks indicate the  $p$ -values associated with each measurement, compared to the no crRNA guide control ( $\emptyset$ ). \*\* $p \leq 0.005$ ; \*\*\* $p \leq 0.001$ .

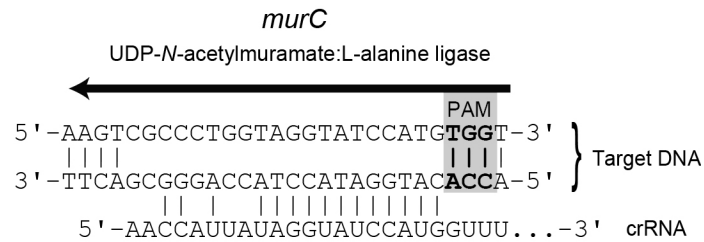

**Figure S3.** In the course of this study we were unable to clone a spacer with a perfect match to the *gfp-mut2* promoter region into pdCas9. BLAST search revealed a possible secondary target in the *murC* gene, encoding UDP-*N*-acetylmuramate:L-alanine ligase, an essential gene involved in peptidoglycan synthesis. We speculate that the transcriptional block generated produces the death of the transformants.

## Supplementary sequences.

-35, -10 and start codon sequences are highlighted in red, green and blue, respectively.

### > Promoter region of *gfp-mut2* on pDB127

```
AAGCAGAGGAGCAAAAGCTCATTCTGAAGAGGACTTGTTGCGGAAACGACGAGAACAGTTGAAACACAACTTGAA
CAGCTACGGAACCTTTGTGCGTAAGGAAAAGTAAGGAAAACGATTCCTTCTAACAGAAATGTCCTGAGCAATCACCT
ATGAACTGTCGACTCGAGGCCTTGACAGGTACCTCATGGATACCTTATAATGGTTCGGAATTCCTTTAAAGAGGAGA
AATCTAGATG
```

### > Promoter region of *gfp-mut2* on pWJ89

```
AAGCAGAGGAGCAAAAGCTCATTCTGAAGAGGACTTGTTGCGGAAACGACGAGAACAGTTGAAACACAACTTGAA
CAGCTACGGAACCTTTGTGCGTAAGGAAAAGTAAGGAAAACGATTCCTTCTAACAGAAATGTCCTGAGCAATCACCT
ATGAACTGTCGACTCGAGCCTCTATGGATTATCACCTTGGCTGCAGGCCGGATCTTCCACAACACGCACGGTGTTAC
ATTAGGCATACCGGTCTTGACAGTAGCTCAGTCCTAGGGATTGTGCTAGCGAATTCCTTTAAAGAGGAGAAATCTA
GATG
```

### > Promoter region of *gfp-mut2* on pWJ96

```
AAGCAGAGGAGCAAAAGCTCATTCTGAAGAGGACTTGTTGCGGAAACGACGAGAACAGTTGAAACACAACTTGAA
CAGCTACGGAACCTTTGTGCGTAAGGAAAAGTAAGGAAAACGATTCCTTCTAACAGAAATGTCCTGAGCAATCACCT
ATGAACTGTCGACTCGAGCCTCTATGGATTATCACCTTGGCTGCAGGCCGGATCTTCCACAACACGCACGGTGTTAC
ATTAGGCATACCGGTCTTGACAGTAGCTCAGTCCTAGGGACTATGCTAGCGAATTCCTTTAAAGAGGAGAAATCTA
GATG
```

### > Promoter region of *gfp-mut2* on pWJ97

```
AAGCAGAGGAGCAAAAGCTCATTCTGAAGAGGACTTGTTGCGGAAACGACGAGAACAGTTGAAACACAACTTGAA
CAGCTACGGAACCTTTGTGCGTAAGGAAAAGTAAGGAAAACGATTCCTTCTAACAGAAATGTCCTGAGCAATCACCT
ATGAACTGTCGACTCGAGCCTCTATGGATTATCACCTTGGCTGCAGGCCGGATCTTCCACAACACGCACGGTGTTAC
ATTAGGCATACCGGTCTTTACGGTAGCTCAGTCCTAGGTACAATGCTAGCGAATTCCTTTAAAGAGGAGAAATCTA
GATG
```

### > *gfp-mut2*

```
ATGAGTAAAGGAGAAGAAGCTTTTCACTGGAGTTGTCCCAATTCTTGTTGAATTAGATGGTGATGTTAATGGGCACAA
ATTTTCTGTGAGTGGAGAGGGTGAAGGTGATGCAACATACGGAACCTTACCCTTAAATTTATTTGCACTACTGGAA
AACTACCTGTTCCATGGCCAACACTTGTCACTACTTTTCGCGTATGGTCTTCAATGCTTTGCGAGATACCCAGATCAT
ATGAAACAGCATGACTTTTTCAAGAGTGCCATGCCCGAAGGTTATGTACAGGAAAGAAGTATATTTTTTCAAGATGA
CGGGAACACTACAAGACACGTGCTGAAGTCAAGTTTGAAGGTGATACCCTTGTTAATAGAATCGAGTTAAAGGTATTG
ATTTTAAAGAAGATGGAACATTCTTGGACACAAATTGGAATACAACACTATAACTCACACAATGTATACATCATGGCA
GACAAACAAAAGAATGGAATCAAAGTTAACTTCAAATTAGACACAACATTGAAGATGGAAGCGTTCAACTAGCAGA
CCATTATCAACAAAATACTCCAATTGGCGATGGCCCTGTCCTTTTACCAGACAACCATTACCTGTCCACACAATCTG
CCCTTTCGAAAGATCCAACGAAAAGAGAGACCACATGATCCTTCTTGAGTTTGTAACAGCTGCTGGGATTACACAT
GGCATGGATGAACTATACAAATAA
```

## Supplementary Tables.

### Table S1. Oligonucleotides

| Number | Sequence (5'-3')                                             | Purpose                 |
|--------|--------------------------------------------------------------|-------------------------|
| B337   | GACGCTATTTGTGCCGATAGCTAAGCCTATTGAGTATTTTC                    | Cas9D10A-R              |
| B338   | GAAATACTCAATAGGCTTAGCTATCGGCACAAATAGCGTC                     | Cas9D10A-F              |
| B339   | GGAAACTTTGTGGAACAATGGCATCGACATCATAATCACT                     | Cas9H840A-R             |
| B340   | AGTGATTATGATGTCGATGCCATTGTTCCACAAAGTTTCC                     | Cas9H840A-F             |
| B368   | TTTGGATCCTTATTTGTATAGTTTCATCCATGCC                           | BamHI-GFPmut2-R         |
| B369   | tcgagggccTTGACAggtacctcatggataccTATAATggttccgg               | PAM-rich promoter-F     |
| B370   | aattccggaaccATTATAggtatccatgaggtaccTGTCAGggcc                | PAM-rich promoter-R     |
| B371   | ACAGAATTCCTTTAAAGAGGAGAAATCTAGATGAGTAAAGGAGAAGAACTTTTC       | EcoRI-RBS-XbaIGFPmut2-F |
| B441   | TCCTGAACAGTTACGCGTGCAGCTGCGTCCACTCCTAGCTGACTCAAATC           | pdCas9 (C-terminal)     |
| B442   | TGAGTCAGCTAGGAGGTGACGCAGCTGCACGCGTAACTGTTTCAGGACGCTG         | rpoZ (C-terminal)       |
| B446   | CTATTGCTGAAGGTCGTCGCTGCAGATAAGAAATACTCAATAGGCTTAG            | pdCas9 (N-terminal)     |
| B448   | CCTATTGAGTATTTCTTATCTGCAGCAGCAGACCTTCAGCAATAGCGG             | rpoZ (N-terminal)       |
| B507   | TCGGCGCTACGGCGTTTCACTTCTGAGTTCCGG                            | 5s rRNA probe           |
| L402   | TTTCCCTTGAAC TAGTCGAAGG                                      | pCEP-BM105-F            |
| L403   | AGTCATCCCAGCAACAAATGG                                        | pCEP-BM112-R            |
| P510   | AAACTTGACTTCAGCACGTGTCTTGTAGTTCC                             | 3'probe GFP             |
| P511   | CAACAAGAATTGGGACAAC TCCAGTGAAAAGTTCC                         | 5'probe GFP             |
| H001   | GGGCACTTTTTCACTCATTTTAGCTTCCTTAGCTCCTGAAAATC                 | (spec)-pCas9-F          |
| H002   | GGTGCCAGCCAATGATTTTTTTAAGGCAGTTATTGG                         | (spec)-pCas9-R          |
| H003   | GCTAAGGAAGCTAAAATGAGTGAAAAGTGCCCGCC                          | (pCas9)-spec -F         |
| H004   | ACTGCCTTAAAAAATCATTTGGCTGGCACCAAGCAG                         | (pCas9)-spec-R          |
| W573   | TCATGCCAGTCATTTCTTACCTGTGGAGCTTTTTAAGTcctgttgataccgggaagcc   | rpoZ-spec-F             |
| W574   | TCAGGCTTTCAAACAGATACAAGGGCGACCCGCTTTGTGAtctaggcaccaataactgcc | rpoZ-spec-R             |
| W551   | TTGCTGAAGGTCGTCGTTAATACTCTTAATAAATGCAGTAATACAGGG             | pdCas9 (C-terminal)     |
| W552   | CAGGTTTCAGTCTGCCAACAATTTGTTCAATAATAGTTTTAATGACCTCCG          | pdCas9 (N-terminal)     |
| W550   | CTGTATTACTGCATTTATTAAGAGTATTAACGACGACCTTCAGCAATAG            | rpoZ (C-terminal)       |
| W553   | CGGAGGTCATTAAACTATTATTGAACAAATTTGTTGGCAGACTGAACCTG           | rpoZ (N-terminal)       |

**Table S2. Plasmids**

| Name        | Genotype                                                                                       | Reference  |
|-------------|------------------------------------------------------------------------------------------------|------------|
| pLZ12spec   | pLZ12, specR                                                                                   | (33)       |
| pDB98       | pLZ21spec, repeat-Bsal spacer-repeat                                                           | (23)       |
| pCas9       | pACYC184(CmR) with tracrRNA, <i>cas9</i> , repeat-Bsal spacer-repeat                           | (23)       |
| pdCas9      | pACYC184(CmR) with tracrRNA, <i>cas9</i> (D10A, H840A), repeat-Bsal spacer-repeat              | this study |
| pWJ66       | pACYC184(CmR) with tracrRNA, <i>cas9</i> (D10A, H840A)- $\omega$ , repeat-Bsal spacer-repeat   | this study |
| pWJ68       | pACYC184(CmR) with tracrRNA, $\omega$ - <i>cas9</i> (D10A, H840A), repeat-Bsal spacer-repeat   | this study |
| pDB191      | pACYC184(SpecR) with tracrRNA, <i>cas9</i> (D10A, H840A)- $\omega$ , repeat-Bsal spacer-repeat | this study |
| pDB192      | pACYC184(SpecR) with tracrRNA, $\omega$ - <i>cas9</i> (D10A, H840A), repeat-Bsal spacer-repeat | this study |
| pZS*24-MCS1 | pSC101*, KanR                                                                                  | (36)       |
| pDB127      | pZS*24-MCS1, PAM-rich promoter, <i>gfp-mut2</i>                                                | this study |
| pWJ89       | pZS*24-MCS1, PAM-rich 5' UTR region, J23117, <i>gfp-mut2</i>                                   | this study |
| pWJ96       | pZS*24-MCS1, PAM-rich 5' UTR region, J23116, <i>gfp-mut2</i>                                   | this study |
| pWJ97       | pZS*24-MCS1, PAM-rich 5' UTR region, J23110, <i>gfp-mut2</i>                                   | this study |

**Table S3. Spacer sequences**

| Name  | sequence (5'-3')                | Target | Figure |
|-------|---------------------------------|--------|--------|
| T0    | CTACGGAACCTCTGTGCGTAAGGAAAAGTA  | pDB127 | 1      |
| T1    | CTGAGCAATCACCTATGAACTGTGACTCG   | pDB127 | 1      |
| T3    | TGTCGACTCGAGGCCTTGACAGGTACCTCA  | pDB127 | 1      |
| T4    | CCTTGACAGGTACCTCATGGATACCTATAA  | pDB127 | 1      |
| T5    | CAGGTACCTCATGGATACCTATAATGGTTC  | pDB127 | 1      |
| T6    | ACCTATAATGGTTCGGAATTCCTTTAAAG   | pDB127 | 1      |
| T7    | CCTTTAAAGAGGAGAAATCTAGATGAGTAA  | pDB127 | 1      |
| T8    | CTAGATGAGTAAAGGAGAAGAACTTTTCAC  | pDB127 | 1      |
| T9    | TGGAGTTGTCCCAATTCTTGTGAATTAGA   | pDB127 | 1      |
| T10   | TCAAGAGTGCCATGCCCGAAGGTATGTAC   | pDB127 | 1      |
| T11   | GATACCCTTGTTAATAGAATCGAGTTAAAA  | pDB127 | 1      |
| B0    | TCTTCAGAAATGAGCTTTTGCTCCTCTGCT  | pDB127 | 1      |
| B1    | CCTTTACTCATCTAGATTCTCCTCTTTAA   | pDB127 | 1      |
| B2    | TAGGTGATGCTCAGGACATTTCTGTTAGA   | pDB127 | 1      |
| B3    | CTCGAGTCGACAGTTCATAGGTGATTGCTC  | pDB127 | 1      |
| B4    | ACCTGTCAAGGCCTCGAGTCGACAGTTCAT  | pDB127 | 1      |
| B5    | CCATTATAGGTATCCATGAGGTACCTGTCA  | pDB127 | 1      |
| B7    | TCCTCTTTAAAGGAATTCGGAACCATTAT   | pDB127 | 1      |
| B8    | CATCTAGATTTCTCCTCTTTAAAGGAATTC  | pDB127 | 1      |
| B9    | ATTAACATCACCATCTAATTCAACAAGAAT  | pDB127 | 1      |
| B10   | CTTGAAAAAGTCATGCTGTTTCATATGATC  | pDB127 | 1      |
| B11   | CAATACCTTTTAACTCGATTCTATTAACAA  | pDB127 | 1      |
| B1m2  | CCTTTACTCAAGTAGATTCTCCTCTTTAA   | pDB127 | 2      |
| B1m4  | CCTTTACTCAAGATGATTCTCCTCTTTAA   | pDB127 | 2      |
| B1m6  | CCTTTACTCAAGATCTTTTCTCCTCTTTAA  | pDB127 | 2      |
| B1m8  | CCTTTACTCAAGATCTAATCTCCTCTTTAA  | pDB127 | 2      |
| B1m10 | CCTTTACTCAAGATCTAAAGTCTCCTTTAA  | pDB127 | 2      |
| B1m12 | CCTTTACTCAAGATCTAAAGAGCTCTTTAA  | pDB127 | 2      |
| B1m14 | CCTTTACTCAAGATCTAAAGAGGACTTTAA  | pDB127 | 2      |
| T5m2  | CAGGTACCTCTAGGATACCTATAATGGTTC  | pDB127 | 2      |
| T5m4  | CAGGTACCTCTACCATACCTATAATGGTTC  | pDB127 | 2      |
| T5m6  | CAGGTACCTCTACCTAACCTATAATGGTTC  | pDB127 | 2      |
| T5m8  | CAGGTACCTCTACCTATGCTATAATGGTTC  | pDB127 | 2      |
| T5m10 | CAGGTACCTCTACCTATGGAATAATGGTTC  | pDB127 | 2      |
| T5m12 | CAGGTACCTCTACCTATGGATAAATGGTTC  | pDB127 | 2      |
| T5m14 | CAGGTACCTCTACCTATGGATATTTGGTTC  | pDB127 | 2      |
| B10m2 | CTTGAAAAAGAGATGCTGTTTCATATGATC  | pDB127 | 2      |
| B10m4 | CTTGAAAAAGAGTAGCTGTTTCATATGATC  | pDB127 | 2      |
| B10m6 | CTTGAAAAAGAGTACGTGTTTCATATGATC  | pDB127 | 2      |
| B10m8 | CTTGAAAAAGAGTACGACTTTTCATATGATC | pDB127 | 2      |



|        |                                 |                           |    |
|--------|---------------------------------|---------------------------|----|
| B10m10 | CTTGAAAAAGAGTACGACAATCATATGATC  | pDB127                    | 2  |
| B10m12 | CTTGAAAAAGAGTACGACAAAGATATGATC  | pDB127                    | 2  |
| B10m14 | CTTGAAAAAGAGTACGACAAAGTAATGATC  | pDB127                    | 2  |
| B10m2  | CTTGAAAAAGAGATGCTGTTTCATATGATC  | pDB127                    | 2  |
| B10m4  | CTTGAAAAAGAGTAGCTGTTTCATATGATC  | pDB127                    | 2  |
| B10m6  | CTTGAAAAAGAGTACGTGTTTCATATGATC  | pDB127                    | 2  |
| B10m8  | CTTGAAAAAGAGTACGACTTTCATATGATC  | pDB127                    | 2  |
| B10m10 | CTTGAAAAAGAGTACGACAATCATATGATC  | pDB127                    | 2  |
| B10m12 | CTTGAAAAAGAGTACGACAAAGATATGATC  | pDB127                    | 2  |
| B10m14 | CTTGAAAAAGAGTACGACAAAGTAATGATC  | pDB127                    | 2  |
| Z1     | ACAACACGCACGGTGTACATTAGGCACCC   | KS1ΔZ lacZ promoter       | 3  |
| Z2     | GATCTTCGACAACACGCACGGTGTACATT   | KS1ΔZ lacZ promoter       | 3  |
| Z3     | GGCTGCAGGTCGGATCTTCGACAACACGCA  | KS1ΔZ lacZ promoter       | 3  |
| Z4     | ATTCTGTGGAAGATCAGCTTGGCTGCAGGT  | KS1ΔZ lacZ promoter       | 3  |
| bga1   | TAGTACTGCCAAAGCCCAAGTGGTATACA   | <i>S. pneumoniae</i> bgaA | S2 |
| bga2   | GTTGTCATACCATGTATACCACTGGGCTT   | <i>S. pneumoniae</i> bgaA | S2 |
| bga3   | TAGTGCAGTTAGCTACTGCCAAAGCCCAAG  | <i>S. pneumoniae</i> bgaA | S2 |
| bga4   | TGAGAATCCATGTAGACGCCATCAAAGTA   | <i>S. pneumoniae</i> bgaA | S2 |
| bga5   | ATGTTTCGCCTTACTTTTGATGGCGTCTACA | <i>S. pneumoniae</i> bgaA | S2 |
| W101   | GATCTTCCACAACACGCACGGTGTACATT   | pWJ89                     | 4  |
| W102   | GGCTGCAGGCCGGATCTTCCACAACACGCA  | pWJ89                     | 4  |
| W103   | CCTCTATGGATTATCACCTTGGCTGCAGGC  | pWJ89                     | 4  |
| W104   | GTCGACTCGAGCCTCTATGGATTATCACCT  | pWJ89                     | 4  |
| W105   | TCACCTATGAACTGTCGACTCGAGCCTCTA  | pWJ89                     | 4  |
| W106   | GGTATGCCTAATGTAACACCGTGCCTGTTG  | pWJ89                     | 4  |
| W107   | AATGTAACACCGTGCCTGTTGTGGAAGATC  | pWJ89                     | 4  |
| W108   | GCGTGTGTTGGAAGATCCGGCCTGCAGCCA  | pWJ89                     | 4  |
| W109   | CCGGCCTGCAGCCAAGGTGATAATCCATAG  | pWJ89                     | 4  |
| W110   | AATCCATAGAGGCTCGAGTCGACAGTTCAT  | pWJ89                     | 4  |
